Anesthesiology  
1997; 87:297-307  
© 1997 American Society of Anesthesiologists, Inc.  
Lippincott-Raven Publishers

## Physiologic Determinants of the Response to Inhaled Nitric Oxide in Patients with Acute Respiratory Distress Syndrome

Claire Manktelow, M.D.,\* Luca M. Bigatello, M.D.,† Dean Hess, R.R.T., Ph.D.,‡ William E. Hurford, M.D.‡

**Background:** The response to inhaled nitric oxide (NO) in patients with acute respiratory distress syndrome (ARDS) varies. It is unclear which patients will respond favorably and whether the initial response persists over time. The authors defined a clinically useful response to inhaled NO as an increase of more than 20% of the ratio of the partial pressure of oxygen ( $P_{aO_2}$ ) to the inspiratory fraction of oxygen ( $FiO_2$ ), a decrease of more than 20% of pulmonary vascular resistance, or both. The authors hypothesized that patients who initially respond favorably are likely to show persistent improvements of gas exchange and hemodynamics after 48 h of NO inhalation.

**Methods:** The medical records and collected research data of 88 patients with ARDS who received 92 trials of NO inhalation between March 1991 and February 1996 were reviewed.

**Results:** Fifty-three of the 92 trials (58%) produced a clinically significant response to NO. In the responding patients who continued to receive NO therapy ( $n = 43$ ), the  $P_{aO_2}/FiO_2$  ratio remained higher ( $120 \pm 46$  vs.  $89 \pm 32$  mmHg before NO;  $P < 0.01$ ) and the mean pulmonary artery pressure remained lower ( $35 \pm 8$  vs.  $40 \pm 12$  mmHg before NO;  $P < 0.01$ ) at 48 h. Only 33% of the patients with septic shock responded to inhaled NO compared with 64% of those without septic shock ( $P < 0.02$ ).

**Conclusions:** Most patients with ARDS had clinically useful responses to NO inhalation. Patients with an initial favorable response maintained the improvement at 48 h. Patients with

septic shock were less likely to respond favorably. (Key words: Gases: nitric oxide. Lung: acute respiratory distress syndrome; pulmonary hypertension. Ventilation: mechanical.)

Acute pulmonary hypertension and increased venous admixture are characteristic of the acute respiratory distress syndrome (ARDS).<sup>1</sup> Current therapies for ARDS include treatment of underlying infections and support with supplemental inspired oxygen, endotracheal intubation, and mechanical ventilation with positive end-expiratory pressure. Although these measures can effectively improve arterial oxygenation, they do not reduce pulmonary hypertension, which fosters pulmonary edema, increases right ventricular afterload, and has been associated with increased mortality rates.<sup>2</sup> Furthermore, high inspired oxygen concentrations and alveolar pressures associated with mechanical ventilation can cause additional damage to the lung parenchyma.<sup>3</sup>

Nitric oxide (NO) is a potent endogenous vasodilator with a very short half-life.<sup>4</sup> Nitric oxide produces vascular relaxation by activating guanylate cyclase and increasing intracellular concentrations of guanosine 3',5'-cyclic monophosphate (cGMP). Inhalation of low concentrations of NO produces local vasodilation of the pulmonary circulation and reduces acute pulmonary hypertension of diverse causes.<sup>5,6</sup> By selectively vasodilating ventilated areas of the pulmonary vasculature, inhaled NO can also improve the matching of perfusion to ventilation and reduce venous admixture in acutely injured lungs.<sup>7</sup> Because of its high affinity for hemoglobin, inhaled NO is rapidly inactivated in blood and does not vasodilate the systemic circulation.

Multiple small case series and a randomized, prospective, multiple-center trial have documented that inhalation of low doses of NO can effectively reduce pulmonary hypertension and increase the arterial oxygen tension of a select population of patients with ARDS.<sup>8-12</sup> Few definitive data, however, are available on the determinants of response, on the safety of NO inhalation,

\* Clinical and Research Fellow in Anaesthesia.

† Assistant Professor of Anaesthesia.

‡ Associate Professor of Anaesthesia.

Received from the Department of Anesthesia and Critical Care and the Respiratory Care Services, Massachusetts General Hospital, Harvard Medical School, Boston, Massachusetts. Submitted for publication October 3, 1996. Accepted for publication April 9, 1997. Presented in part at the International Conference of the American Thoracic Society, New Orleans, Louisiana, May 18-22, 1996. Supported by funds from AGA AB (Stockholm, Sweden). The Massachusetts General Hospital has been granted a patent on the respiratory uses of nitric oxide and has licensed its rights.

Address reprint requests to Dr. Hurford: Department of Anesthesia and Critical Care, Massachusetts General Hospital, Fruit Street, Boston, Massachusetts 02114. Address electronic mail to: Hurford@etherdome.mgh.harvard.edu

and on its effect on outcome in patients with ARDS. Furthermore, because of the experimental nature of this therapy, investigators have used widely different delivery systems, inhaled concentrations, measurement techniques, and patient populations. At the Massachusetts General Hospital, we have used NO inhalation on an experimental basis to treat acute respiratory failure of various causes since March 1991. Unlike the patients in a recent multiple-center study,<sup>12</sup> the patients we studied frequently had septic shock and significant extrapulmonary organ system dysfunction. All had severe respiratory failure. We designed the current study to review our initial, 5-yr practice of NO inhalation for patients with ARDS and to address the following questions:

1. What is the incidence of a significant beneficial response to NO inhalation?
2. What factors are predictive of the patient's initial responsiveness to NO?
3. Is an initial beneficial response sustained for 48 h?

## Methods

We reviewed the medical records and computer-archived research data of all adult patients with acute respiratory failure, acute pulmonary hypertension, or both who received inhaled NO as part of experimental protocols approved by the Subcommittee on Human Studies of the Massachusetts General Hospital. All patients or their families gave written informed consent before treatment with inhaled NO. Retrospective data collection for the current review was performed for all patients who received inhaled NO between March 1, 1991 and September 1, 1995; prospective data collection was subsequently continued until February 29, 1996.

### Definitions

ARDS was defined according to the criteria of the American-European Consensus Conference: (1) acute respiratory insufficiency requiring mechanical ventilation; (2) a partial pressure of oxygen ( $P_{aO_2}$  to inspiratory fraction of oxygen ( $F_{iO_2}$ ) ratio less than 200 mmHg; (3) bilateral pulmonary consolidations on chest radiograph; (4) a pulmonary artery occlusion pressure  $\geq$  18 mmHg or absence of clinical signs of left atrial hypertension.<sup>1</sup> Patients treated with inhaled NO who did not meet these criteria were not included in the current review.

We defined "responders" as those patients in whom NO inhalation resulted in a clinically meaningful physiologic improvement; that is, an increase of the  $P_{aO_2}/F_{iO_2}$  ratio of  $\geq$  20% from baseline, a decrease of pulmonary vascular resistance (PVR)  $\geq$  20% from baseline after 30 min of NO treatment, or both. This definition is similar to one used in a recent multiple-center trial of NO.<sup>12</sup> All other patients were considered to be "nonresponders." We defined as "NO trial only" those trials of NO inhalation that lasted  $\geq$  4 h and "NO treatment" as those that lasted more than 4 h.

Criteria for the definition of organ system failure were modified from Knaus *et al.*<sup>13</sup> Hemodynamic failure was defined as a mean systemic arterial pressure (MAP)  $\geq$  55 mmHg or arterial pH  $\geq$  7.24 with a partial pressure of carbon dioxide ( $P_{aCO_2}$ )  $\geq$  48 mmHg or the need for inotropic or vasopressor agents to maintain an adequate systemic blood pressure in the absence of hypovolemia. This definition of vasopressor infusion excluded individual practice preferences such as the use of low doses of dopamine or dobutamine ( $<$  5  $\mu\text{g} \cdot \text{kg}^{-1} \cdot \text{min}^{-1}$ ) for potential renal effects or to increase cardiac output in normotensive patients. Coagulopathy was defined as a platelet count  $\geq$  90,000/ $\text{mm}^3$  and a prothrombin time or a partial thromboplastin time  $\geq$  1.5 times control or a hematocrit concentration  $\geq$  20%. Liver failure was total serum bilirubin concentration  $\geq$  4 mg/dl. Renal failure was considered to be serum creatinine concentration  $\geq$  2.5 mg/dl. All determinations were made less than 12 h before NO administration.

Systemic inflammatory response syndrome (SIRS) was defined according to the American College of Chest Physicians/Society of Critical Care Medicine (ACCP/SCCM) Consensus Conference<sup>14</sup> as the presence of two or more of the following conditions: temperature more than 38°C or less than 36°C; heart rate more than 90 beats/min; respiratory rate more than 20 breaths/min or  $P_{aCO_2}$  less than 32 mmHg; white blood count more than 12,000 cells/ $\text{mm}^3$ , less than 4,000 cells/ $\text{mm}^3$ , or more than 10% immature (band) forms. The SIRS category includes those patients who, in addition to meeting SIRS criteria, had a documented source of infection, without evidence of organ failure other than the lung (*i.e.*, sepsis in the ACCP/SCCM Consensus Conference<sup>14</sup>). Septic shock was defined as the presence of SIRS (including sepsis) associated with hypotension (mean arterial pressure less than 90 mmHg or a reduction of more than 40 mmHg from baseline in the ab-

## INHALED NO IN ARDS

sence of other causes of hypotension) persisting despite adequate fluid resuscitation, along with the presence of organ system dysfunction. Patients receiving inotropic or vasopressor agents may no longer have been hypotensive by the time they manifested hypoperfusion abnormalities or organ dysfunction, yet they were still considered to have septic shock.

### *Clinical and Laboratory Data Collection*

The following data were recorded for all patients who fulfilled the criteria for ARDS:

1. Clinical characteristics. Age, sex, diagnosis, medications, cause of ARDS, days of mechanical ventilation and hospitalization, presence of SIRS, septic shock, and organ system failure were recorded. The Lung Injury Score described by Murray *et al.*<sup>15</sup> was computed just before NO administration. The APACHE II score described by Knaus *et al.*<sup>16</sup> was computed using data collected within 12 h before NO administration.
2. Gas exchange and ventilatory variables. Arterial and mixed venous blood gas tensions and pH,  $F_{I_{O_2}}$ , the mode of mechanical ventilation, positive end-expiratory pressure, peak inspiratory pressure, tidal volume, and dynamic respiratory system compliance [(peak inspiratory pressure - positive end-expiratory pressure)/tidal volume] were recorded. These variables were recorded just before NO administration, 30 min after the beginning of NO inhalation, and approximately 48 h later ( $48 \pm 12$  h).
3. Hemodynamic variables. Heart rate, systolic and diastolic systemic arterial pressure, central venous pressure, systolic and diastolic pulmonary artery pressure (PAP), pulmonary artery occlusion pressure, and cardiac output were recorded immediately before NO, at 30 min, and 48 h after the beginning of NO inhalation. Mean systemic arterial pressure and mean pulmonary arterial pressure were calculated as (systolic - diastolic pressure)/3 + diastolic pressure. Hemodynamic measurements were always obtained at end exhalation with the supine zero reference level taken at the mid-axillary line. Thermodilution cardiac output was measured three times. Systemic vascular resistance, PVR, and venous admixture were calculated using standard formulas. Requirements for vasopressor and/or inotropic therapy immediately before NO inhalation and 48 h after its initiation were also recorded.
4. Laboratory data. All hematologic and chemical values necessary to calculate the APACHE II score, as well as to assess coexisting organ system failure, were measured within 12 h before the administration of NO. Methemoglobin concentration was measured immediately before and 30 min after initiation of inhaled NO and daily or every other day thereafter. Initial and subsequent daily doses of inhaled NO were recorded. Inspired nitrogen dioxide ( $NO_2$ ) concentration was measured when patients were maintained on an inspired NO concentration of  $\geq 20$  ppm and an  $F_{I_{O_2}} \geq 75\%$ .
5. Clinical outcome. The total duration of mechanical ventilation and the duration of intensive care unit and hospital stays were recorded. Survival was measured from the date of first NO administration to the date of death or hospital discharge.

### *Method of Nitric Oxide Administration*

Nitric oxide was administered to all patients using the methods described previously.<sup>9</sup> Nitric oxide source gas (780–880 ppm; Airco, Riverton, NJ) was stored in nitrogen ( $N_2$ ). Nitric oxide in nitrogen was then mixed with nitrogen or air (Bird Blender, Palm Springs, CA) and delivered to the air intake of a Puritan-Bennett 7200 ventilator (Carlsbad, CA). In the ventilator, the  $NO/N_2$  mixture was blended with oxygen and administered to the patient during inspiration. Inspired NO and  $NO_2$  concentrations were measured with a chemoluminescence analyzer (model 14A, Thermo Environmental Instruments, Franklin, MA; or model CLD700AL<sub>med</sub>, Eco Physics, Postfach, Switzerland) or with an NO electrochemical analyzer (Bedfont Scientific, Kent, UK). The inspired concentration of  $NO_2$  was intermittently monitored with an electrochemical  $NO_2$  analyzer (Bedfont Scientific).

### *Statistical Analysis*

Normally distributed data are expressed as means  $\pm$  SD. Nonparametrically distributed data are expressed as medians and ranges. Group means were compared by paired or unpaired *t* test or Wilcoxon by signed-rank test, as appropriate. Rates were compared by the chi-squared test. We used a multivariate logistic regression model (SPSS 6.0 statistical package; SPSS Software, Chicago, IL) to analyze the effect of multiple variables on the responsiveness to NO inhalation. Linear regressions were used to examine the association between two variables. Estimates of survival were based on the

**Table 1. Characteristics of NO Inhalation in the 88 ARDS Study Patients**

|                                  | Median | Range  |
|----------------------------------|--------|--------|
| Days on NO treatment             | 8      | <1-71  |
| NO dose at start (ppm)           | 20     | 5-80   |
| NO dose at 48 hr (ppm)           | 10     | 4-30   |
| NO dose on discontinuation (ppm) | 10     | 0.1-24 |
| Methemoglobin (%)                | 0.8    | 0-3.9  |
| NO <sub>2</sub> inhaled (ppm)    | 0.4    | 0-4.3  |

Kaplan-Meier method; comparison of survival between groups was based on the log-rank test (NCSS 6.0 statistical package; NCSS, Kaysville, Utah). All tests of significance were two tailed, and probability values less than 0.05 were considered significant.

## Results

### Patient Characteristics

One hundred twenty-one adult intensive care unit patients received NO inhalation for acute respiratory failure, acute pulmonary hypertension, or both at our hospital during the 5-yr period between March 1991 and March 1996. Thirty-three of these patients received NO for indications other than ARDS (cardiac surgery, lung transplantation, or lung-volume reduction surgery). Eighty-eight patients fulfilled the criteria for ARDS and were included in the analysis. Inhaled NO was administered during 92 trials in these patients: four patients received two trials 48 h to 14 months apart. The median inspired NO concentration at the start of treatment was 20 ppm (range, 5-80 ppm); one patient received 80 ppm NO, two patients received 40 ppm, and all others received a maximum of 20 ppm. The inspired dose was decreased to 10 ppm (range, 4-30 ppm) by 48 h (table 1). Thirteen of these patients were included in a previously published study of NO inhalation.<sup>9</sup>

During the 5-yr period of the current review, the customary NO dose for prolonged treatment was reduced from 20 ppm to  $\leq 5$  ppm. Over the range of inhaled NO concentrations, we could not document a significant dose-response effect for any variable. Accordingly, data from all levels were combined for further analysis.

The mean age of the patients with ARDS was  $52 \pm 16$  yr. Fifty-three were men, and 35 were women. The patients had received mechanical ventilation for  $8 \pm 6$  days before enrollment. Their APACHE II score was 27

**Table 2. Etiology of ARDS in the 88 Study Patients**

|                                | No. (%) |
|--------------------------------|---------|
| Pneumonia                      |         |
| Medical                        | 23 (26) |
| Post-surgical                  | 16 (18) |
| Aspiration of gastric contents |         |
| Medical                        | 10 (11) |
| Post-surgical                  | 7 (8)   |
| Burns                          | 6 (7)   |
| Multiple trauma                | 6 (7)   |
| Pancreatitis                   | 3 (3)   |
| Peritonitis                    | 2 (2)   |
| Fat embolism                   | 1 (1)   |
| Toxic shock syndrome           | 1 (1)   |
| Near drowning                  | 1 (1)   |
| Other (etiology unknown)       |         |
| Medical                        | 4 (5)   |
| Post-surgical                  | 8 (9)   |

$\pm 6$  and their Lung Injury Score score was  $3.3 \pm 0.6$ . Table 2 shows the underlying causes of ARDS. The incidence of sepsis and organ system failure at the time of NO treatment is shown in table 3. Seventy-three patients (83%) met the definition of SIRS, and 21 patients (24%) had septic shock. Sixty patients (68%) had at least a second organ system failure in addition to acute respiratory failure. The rate of survival to hospital discharge was 28%.

### Initial Response to Inhaled Nitric Oxide

Table 4 summarizes the physiologic changes occurring after the first 30 min of NO inhalation in the 92 trials. The PaO<sub>2</sub>/F<sub>I</sub>O<sub>2</sub> ratio increased from  $92 \pm 38$  to  $117 \pm 58$  mmHg. Mean PAP ( $37 \pm 10$  to  $34 \pm 8$  mmHg),

**Table 3. Physiologic Abnormalities Associated with ARDS in the 88 Study Patients at the Time of Initiation of NO Treatment**

|                                                               | No. (%) |
|---------------------------------------------------------------|---------|
| Systemic inflammatory response syndrome                       | 73 (83) |
| Septic shock                                                  | 21 (24) |
| Organ system failure in addition to acute respiratory failure | 60 (68) |
| Hemodynamic                                                   | 46 (52) |
| Coagulopathy                                                  | 20 (23) |
| Hepatic                                                       | 18 (20) |
| Renal                                                         | 17 (19) |
| Vasopressor requirement                                       | 46 (52) |

## INHALED NO IN ARDS

**Table 4. Initial Physiologic Response to Inhaled NO in the 88 ARDS Patients (92 Trials)**

|                                                                       | Pre-NO    | 30 min NO Inhalation |
|-----------------------------------------------------------------------|-----------|----------------------|
| Pa <sub>O<sub>2</sub></sub> /Fi <sub>O<sub>2</sub></sub> ratio (mmHg) | 92 ± 38   | 117 ± 58*            |
| Pulmonary vascular resistance (dyne · s · cm <sup>-5</sup> )          | 312 ± 217 | 255 ± 171*           |
| Mean PA pressure (mmHg)                                               | 37 ± 10   | 34 ± 8*              |
| Mean systemic arterial pressure (mmHg)                                | 75 ± 13   | 76 ± 14              |
| Heart rate (beats/min)                                                | 111 ± 21  | 108 ± 20*            |
| Cardiac output (L/min)                                                | 7 ± 2.8   | 7 ± 3.1              |
| Central venous pressure (mmHg)                                        | 14 ± 5    | 13 ± 5               |
| PA occlusion pressure (mmHg)                                          | 15 ± 5    | 15 ± 5               |
| Venous admixture (%)                                                  | 39 ± 13   | 34 ± 14*             |

Data are mean ± SD. A pulmonary artery (PA) catheter was present in 74 of the 92 trials.

\*  $P < 0.05$  versus pre-NO values.

PVR ( $312 \pm 217$  to  $255 \pm 171$  dyne · s<sup>-1</sup> · cm<sup>-5</sup>) and venous admixture ( $38 \pm 13\%$  to  $34 \pm 14\%$ ) decreased ( $P < 0.05$  for all comparisons). Ventilatory parameters and systemic hemodynamics did not change. Of the 92 trials conducted in 88 patients, 53 trials (58%) in 51 patients produced a clinically significant response to NO, and 39 trials (42%) in 37 patients did not.

Table 5 compares the baseline physiologic variables in the 92 trials in responding and nonresponding patients. Septic shock was present in 38% of nonresponders and in 14% of responders ( $P < 0.01$ ). By univariate analysis, patients without septic shock had a significantly higher response rate (65%) to NO inhalation than did those with septic shock (33%;  $P < 0.02$ ). Patients with a serum creatinine concentration greater than 2.5 mg/dl were less likely to respond to NO ( $P < 0.02$ ). In addition, patients ventilated for less than 1 week before NO tended to have an increased response rate to inhaled NO ( $P = 0.06$ ). Age, APACHE II score, lung injury score, and systemic hemodynamic variables at baseline did not differ between responders and nonresponders.

The effects of several baseline variables of interest (age, PAP, serum creatinine concentration, septic shock, days of mechanical ventilation, arterial pH, and vasopressor requirements) on the response to inhaled NO were selected *a priori* to any analysis and then were examined using a multivariate logistic regression model. Only septic shock remained a significant discriminant for responsiveness to NO inhalation; after controlling for all the other variables listed, the absence

of septic shock remained a positive predictor of responsiveness (odds ratio: 3.4;  $P < 0.05$ ).

We correlated baseline pulmonary hemodynamic and gas exchange variables with the magnitude of the response to NO inhalation in those patients with pulmonary artery catheters in place and complete hemodynamic data available ( $n = 63$ ). The percentage changes of PVR and mean PAP after 30 min of NO inhalation were linearly correlated with their respective baseline values ( $r^2 = 0.43$ ,  $P < 0.05$  for PVR and  $r^2 = 0.38$ ,  $P < 0.05$  for mean PAP; fig. 1). In addition, patients with an increased PVR tended to have a greater improvement of Pa<sub>O<sub>2</sub></sub>/Fi<sub>O<sub>2</sub></sub> after 30 min of NO inhalation ( $r^2 = 0.34$ ,  $P < 0.05$ ; fig. 2).

#### Prolonged Nitric Oxide Therapy

Of the 88 study patients, 21 received NO inhalation for  $\geq 4$  h. Reasons for early discontinuation were (1) accordance with early experimental protocols ( $n = 7$ ), (2) insignificant initial clinical response to NO ( $n = 12$ ), and (3) withdrawal of therapy in terminally ill patients ( $n = 2$ ).

**Table 5. Baseline Characteristics of ARDS Patients Who Had a Clinically Significant Response to NO Inhalation versus Those Who Did Not**

|                                                                       | Responders | Nonresponders |
|-----------------------------------------------------------------------|------------|---------------|
| No. of patients                                                       | 51         | 37            |
| Age                                                                   | 51 ± 16    | 53 ± 16       |
| APACHE II score                                                       | 27 ± 6     | 27 ± 5        |
| Lung Injury Score                                                     | 3.2 ± 0.5  | 3.3 ± 0.5     |
| Days ventilated prior to NO                                           | 7 ± 7      | 10 ± 11       |
| Pa <sub>O<sub>2</sub></sub> /Fi <sub>O<sub>2</sub></sub> ratio (mmHg) | 91 ± 34    | 92 ± 43       |
| Pulmonary vascular resistance (dyne · s · cm <sup>-5</sup> )          | 333 ± 232  | 285 ± 191     |
| Mean pulmonary artery pressure (mmHg)                                 | 38 ± 12    | 34 ± 7        |
| Positive end-expiratory pressure (mmHg)                               | 13 ± 4     | 12 ± 3        |
| Cardiac output (L/min)                                                | 6.7 ± 2.4  | 7.5 ± 3.4     |
| Serum creatinine (mg/dl)                                              | 1.4 ± 0.7  | 2.0 ± 1.4*    |
| Serum bilirubin (mg/dl)                                               | 3 ± 4      | 3 ± 7         |
| Platelet count (10 <sup>9</sup> /mm <sup>3</sup> )                    | 170 ± 118  | 192 ± 135     |
| White cell count (10 <sup>3</sup> /mm <sup>3</sup> )                  | 19 ± 9     | 18 ± 9        |
| Systemic inflammatory response syndrome                               | 38 (75%)   | 34 (92%)      |
| Vasopressor requirement                                               | 24 (47%)   | 22 (59%)      |
| Septic shock                                                          | 7 (14%)    | 14 (38%)*     |

Data are mean ± SD.

\*  $P < 0.05$ .

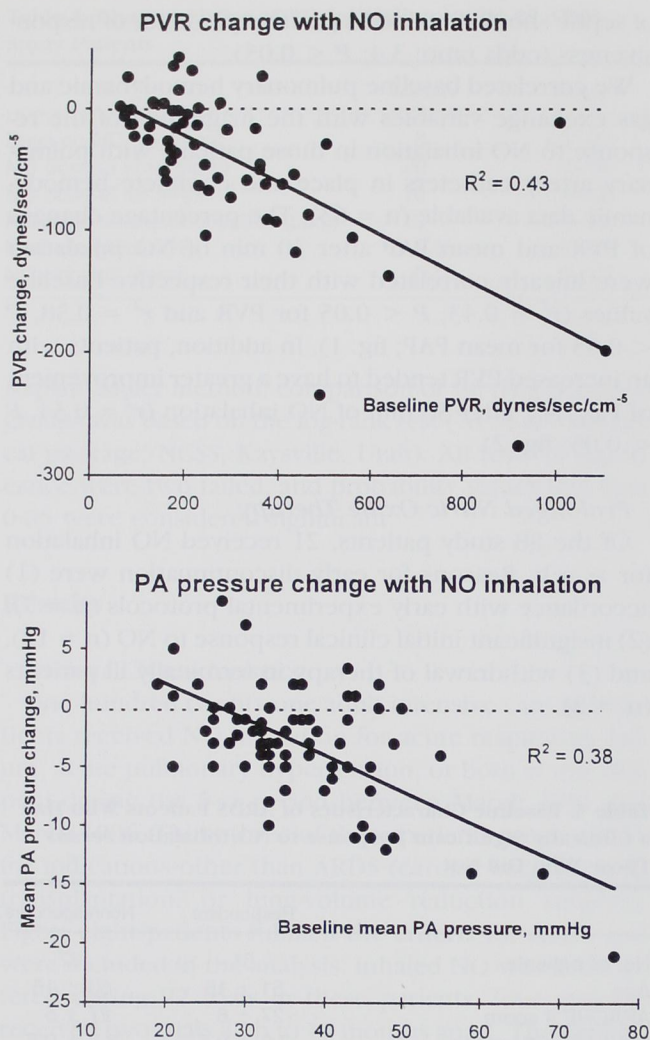

Fig. 1. *Top panel*, Linear correlation between pulmonary vascular resistance (PVR) before NO inhalation and the change of PVR associated with NO inhalation in 63 trials of NO in ARDS patients;  $P < 0.05$ . *Bottom panel*, Linear correlation between mean pulmonary artery (PA) pressure before NO inhalation and the change of mean PA pressure associated with NO inhalation in 71 trials of NO in ARDS patients;  $P < 0.05$ .

Sixty-seven patients received long-term NO inhalation (16 h to 71 days; median, 8 days). After 48 h, the  $\text{Pa}_{\text{O}_2}/\text{Fi}_{\text{O}_2}$  ratio remained significantly higher compared with the baseline value ( $108 \pm 43$  mmHg vs.  $87 \pm 32$  mmHg;  $P < 0.05$ ). Mean PAP was decreased slightly, although this difference was not significant ( $35 \pm 8$  mmHg at 48 h compared with  $38 \pm 10$  mmHg,  $n = 58$ ;  $P = 0.06$ ).

The response to NO inhalation at 48 h was compared

for patients who initially had a significant response and were continued on NO ( $n = 45$  trials) and patients who either were nonresponders or only received a trial of NO ( $n = 47$  trials). As summarized in table 6, the  $\text{Pa}_{\text{O}_2}/\text{Fi}_{\text{O}_2}$  ratio remained higher at 48 h than pre-NO values in the responders who were continued on NO ( $120 \pm 46$  mmHg vs.  $89 \pm 32$  mmHg;  $P < 0.01$ ) but not in the nonresponders/nontreatment group ( $110 \pm 51$  mmHg vs.  $103 \pm 45$  mmHg). The mean PAP remained lower at 48 h in the responders/treated group than in the pre-NO values ( $35 \pm 8$  vs.  $40 \pm 12$  mmHg;  $P < 0.01$ ) but not in the nonresponders/nontreatment group ( $33 \pm 8$  vs.  $34 \pm 7$  mmHg). No other parameters were significantly different from baseline in either group. The median number of days spent in the hospital, days in the intensive care unit, and the number of days receiving mechanical ventilation were comparable between the two groups. The median survival was 24 days in the responders/treated group (30-day survival rate, 43%) compared with 18 days in the nonresponse/nontreatment group (30-day survival rate, 36%). This difference was not significant.

No major adverse events or deaths could be attributed to NO inhalation. The institution of NO inhalation was never associated with significant deterioration of hemodynamics or gas exchange. The median inhaled  $\text{NO}_2$  concentration was 0.4 ppm (range, 0–4.3 ppm). Four patients had a  $\text{NO}_2$  concentration greater than 2 ppm: all were receiving

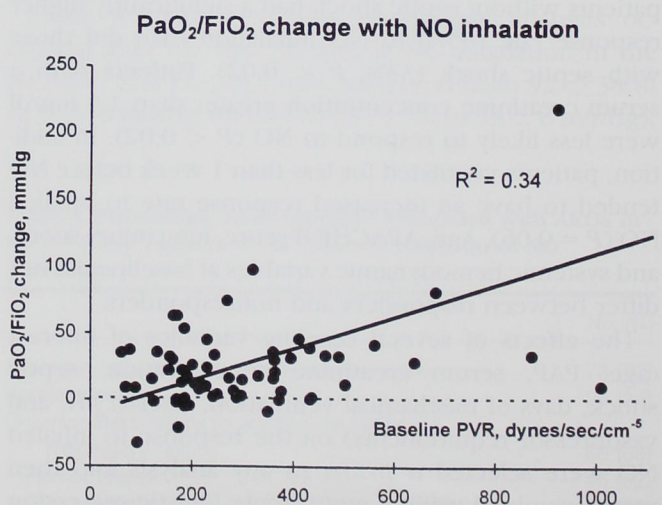

Fig. 2. Linear correlation between pulmonary vascular resistance (PVR) before NO inhalation and the change of  $\text{Pa}_{\text{O}_2}/\text{Fi}_{\text{O}_2}$  ratio associated with NO inhalation in 63 trials of NO in ARDS patients;  $P < 0.05$ .

## INHALED NO IN ARDS

**Table 6. Outcome of 88 ARDS Patients Who Received Inhaled NO**

|                                                                                 | Responders Treated (n = 43) | Nonresponders Trial Only (n = 45) |
|---------------------------------------------------------------------------------|-----------------------------|-----------------------------------|
| Pa <sub>o</sub> <sub>2</sub> /Fi <sub>o</sub> <sub>2</sub> ratio pre-NO (mmHg)  | 89 ± 32                     | 103 ± 45                          |
| Pa <sub>o</sub> <sub>2</sub> /Fi <sub>o</sub> <sub>2</sub> ratio at 48 h (mmHg) | 120 ± 46*                   | 110 ± 51                          |
| Mean pulmonary artery pressure pre-NO (mmHg)                                    | 40 ± 12                     | 33 ± 8                            |
| Mean pulmonary artery pressure at 48 h (mmHg)                                   | 35 ± 8*                     | 34 ± 7                            |
| Pulmonary vascular resistance pre-NO (dyne · s · cm <sup>-5</sup> )             | 341 ± 214                   | 267 ± 207                         |
| Pulmonary vascular resistance at 48 h (dyne · s · cm <sup>-5</sup> )            | 301 ± 154                   | 282 ± 279                         |
| Dynamic respiratory compliance pre-NO (ml/cm H <sub>2</sub> O)                  | 26 ± 11                     | 22 ± 9                            |
| Dynamic respiratory compliance at 48 h (ml/cm H <sub>2</sub> O)                 | 25 ± 10                     | 22 ± 7                            |
| Days hospitalized after NO                                                      | 31 (9-105)                  | 28 (2-141)                        |
| Days in ICU after NO                                                            | 27 (9-80)                   | 25 (2-90)                         |
| Days of mechanical ventilation after NO                                         | 25 (4-81)                   | 23 (3-103)                        |
| 30-day survival after NO (%)                                                    | 43                          | 36                                |

Values are mean ± SD or median (range) for nonparametric data. Treatment was defined as >4 h of NO inhalation. Responders had a ≥20% increase in Pa<sub>o</sub><sub>2</sub>/Fi<sub>o</sub><sub>2</sub> ratio and/or a ≥20% decrease in pulmonary vascular resistance with inhaled NO.

\* *P* < 0.05 versus pre-NO values.

20 ppm NO while also receiving 95% Fi<sub>o</sub><sub>2</sub>. In three of them, NO was discontinued within 1 h; the fourth patient was receiving 10 ppm NO and an Fi<sub>o</sub><sub>2</sub> of 70% by 24 h, and the NO<sub>2</sub> level decreased to less than 1 ppm. The median methemoglobin concentration during NO treatment was 0.8% (range, 0-3.9%). The patient with the highest methemoglobin concentration also had severe hyperlipidemia, which interferes with co-oximetry and may have produced a falsely high value.<sup>17</sup>

With discontinuation of NO inhalation, five patients (6%) developed "rebound," which is acutely increased pulmonary hypertension, hypoxemia, and hemodynamic instability. All these patients were receiving high levels of ventilatory support and required vasopressor therapy for septic shock. Reinstitution of NO inhalation promptly corrected these manifestations and NO withdrawal was postponed until the patient was less severely ill.

## Discussion

We describe a large series of patients with ARDS of diverse causes who received inhaled NO. Preexisting

organ system dysfunction and septic shock were commonly present. In our series, most patients had a favorable immediate clinical response (defined as an improvement of more than 20% of oxygenation and/or decrease of pulmonary hypertension) to inhaled NO. This favorable response appeared to persist for the first 48 h of therapy. The presence of septic shock was associated with a decreased likelihood of response. Adverse consequences of rebound with discontinuation of inhaled NO occurred in 6% of the trials.

### *Incidence of a Clinically Significant Beneficial Effect of Nitric Oxide Inhalation*

Fifty-eight percent of patients with ARDS had a clinically significant response to inhaled NO. This finding is consistent with other reports. Rossaint *et al.*<sup>18</sup> reported that the Pa<sub>o</sub><sub>2</sub>/Fi<sub>o</sub><sub>2</sub> ratio failed to increase in 17% of patients with severe ARDS by at least 10 mmHg, and the mean PAP failed to decrease in 37% by > 3 mmHg after inhalation of 10-20 ppm NO. McIntyre *et al.*<sup>19</sup> observed minimal improvement (Pa<sub>o</sub><sub>2</sub>/Fi<sub>o</sub><sub>2</sub> ratio increase <20%; mean PAP decrease <10%) in 5 of 16 trials (31%) after 20 and 40 ppm NO, respectively. Wysocki *et al.*<sup>20</sup> found that 10 of 17 (59%) patients did not respond to inhaled NO. These variable response rates may be attributed to the different definitions of a clinically important response and the different patient populations studied. We chose a relatively conservative definition that was comparable to that used in a recent phase 2 randomized multiple-center clinical trial.<sup>12</sup> In that trial, which was limited to patients with ARDS without septic shock or significant extrapulmonary organ system dysfunction, a response rate of 65% was reported. Our patients were relatively older and quite ill. The average age of our patients was 52 yr, and their APACHE II scores averaged 27. For comparison, the average age of the patients studied by Rossaint *et al.*<sup>18</sup> was 28 yr, and their average APACHE II score was 18.5.

### *Factors Correlating with the Patient's Initial Responsiveness to Nitric Oxide*

We investigated the possible determinants of the physiologic response to NO, with the aim of identifying patients that may receive the most beneficial effect from NO inhalation. In our study population, 67% of patients with coexisting septic shock did not respond or responded only minimally to inhaled NO. Our findings are consistent with those of Krafft *et al.*,<sup>21</sup> who reported

that 60% of 25 patients with septic ARDS requiring vasopressor and inotropic support did not respond to inhaled NO. In contrast to their study, we compared trials in patients with ARDS with septic and nonseptic shock and found that 64% of patients without septic shock responded. It has been suggested that the variability in response could be explained in part by the use of exogenous catecholamines in the patients with septic shock.<sup>22</sup> Increased catecholamine concentrations conceivably could interfere with the action of NO by exacerbating pulmonary arterial constriction. In our series, however, the use of vasopressors was not significantly different between the responders and the nonresponders. It is also possible that patients with septic shock have an impaired vasodilator response to exogenously administered NO, related to the massive release of endogenous NO, which contributes to the severe hypotension in septic shock.<sup>23</sup> In a sepsis-induced acute lung injury animal model of hyporesponsiveness to inhaled NO, Holzmann *et al.*<sup>24</sup> found that the pulmonary vasodilator response to inhaled NO was impaired after endotoxin administration. The impairment of NO-induced vasodilation was associated with decreased cGMP release into the lung perfusate. This decrease was partly attributable to increased activity of pulmonary cGMP-phosphodiesterases, the enzyme group responsible for breaking down cGMP in the lung. Whether a similar increase of phosphodiesterases activity occurs in the lung of humans with sepsis is unknown. If phosphodiesterases activity in the human lung is increased during sepsis, administration of inhaled NO might fail to increase tissue levels of cGMP sufficiently to produce clinically significant vasodilation.

Renal dysfunction was significantly more common among nonresponders, and the mean serum creatinine concentration was higher in this group (table 5). However, on multivariate analysis, renal failure was associated with the presence of septic shock. In the presence of septic shock, the association of renal failure with an impaired response to inhaled NO was less significant ( $P = 0.07$ ), suggesting that it is a marker for patients with more severe perfusion abnormalities.

Although it did not reach statistical significance ( $P = 0.06$ ), a short course of respiratory failure ( $< 7$  days) tended to be associated with a clinically significant response to inhaled NO. Patients with a more protracted clinical course may have a decreased vasodilator response to inhaled NO because of more severe lung

injury with vascular remodeling or complicating factors such as superimposed sepsis or pneumonia.

We and others previously reported a correlation between the baseline PVR and the degree of pulmonary vasoconstriction reversible by NO inhalation.<sup>9,25,26</sup> In our study, the baseline PVR correlated with the degree of reduction of PVR during NO inhalation ( $r^2 = 0.43$ ;  $P < 0.05$ ) and, to a lesser extent, baseline PAP correlated with the degree of reduction of PAP ( $r^2 = 0.38$ ;  $P < 0.05$ ). Patients with marked pulmonary hypertension appeared to exhibit the greatest response to NO inhalation. Baseline values for PVR and mean PAP were not independently associated with the presence or absence of a significant clinical response (a "responder" as defined in Methods) when examined by multivariate analysis. Several patients with a high PVR failed to respond to inhaled NO. Inhaled NO will not reduce PAP if PVR is not elevated, such as when pulmonary artery hypertension is due primarily to an increase in pulmonary blood flow. The degree of arterial hypoxemia did not predict the extent of pulmonary vasodilation observed with inhaled NO.<sup>9</sup>

#### *Effects of Inhaled Nitric Oxide Treatment*

A sustained effect of NO inhalation on arterial oxygenation and pulmonary hypertension, without evidence of tachyphylaxis, has been previously suggested.<sup>9</sup> Our data confirmed these findings in those patients who had initially responded well to NO and subsequently continued to receive therapy. We did not collect data later than 48 h; as the clinical course progresses, the possible effects of NO would be obscured by other events that make data analysis impossible in the absence of a control group.

Overall, there were no significant differences between the response/treatment group and the nonresponse/nontreatment group in hospital or intensive care unit stay, the number of days receiving mechanical ventilation, or survival rate. The significance of NO responsiveness and therapy on long-term outcome in patients with ARDS remains to be conclusively demonstrated with prospectively designed, controlled studies.

#### *Methemoglobin and Nitrogen Dioxide Formation*

The acute toxicity associated with NO includes NO<sub>2</sub> formation, methemoglobinemia, and peroxyxynitrite formation. High inhaled NO concentrations ( $\geq 2\%$ ) rapidly produce methemoglobinemia and death in experiments with animals.<sup>27</sup> Inhalation of low concentrations of NO



for prolonged periods, however, appears free of acute toxicity.<sup>9,18</sup> Nitrogen dioxide is produced spontaneously from NO and oxygen and is an atmospheric pollutant that has been shown in animal studies to produce toxic effects including severe parenchymal lung injury and death.<sup>28</sup> Lung injury secondary to NO<sub>2</sub> inhalation has been reported after exposure to concentrations as low as 2 ppm.<sup>29-33</sup> Changes included alveolar cell hyperplasia, loss of cilia, and increased bronchial reactivity. Based on these observations, we aim to maintain inspired NO<sub>2</sub> concentrations < 2 ppm at all times. Previous work has shown that NO<sub>2</sub> production in breathing systems during NO inhalation increases with increasing F<sub>I</sub>O<sub>2</sub> and NO concentration, low minute ventilation, and increased lung volumes.<sup>34</sup> We routinely measure the inspired NO<sub>2</sub> concentration when there is an increased risk for NO<sub>2</sub> production; that is when F<sub>I</sub>O<sub>2</sub> ≥ 80% with an NO inspired concentration ≥ 20 ppm. In these circumstances, we also premix the NO with nitrogen instead of air. With the use of lower inhaled NO concentrations (< 10 ppm), we have uniformly been able to maintain the inspired NO<sub>2</sub> concentration well below 2 ppm.

Methemoglobin is produced when the heme iron of hemoglobin is oxidized from Fe<sup>+2</sup> to Fe<sup>+3</sup>.<sup>35</sup> In the oxidized form, the oxygen affinity of the hemoglobin increases and oxygen unloading to the tissues is impaired.<sup>36</sup> Normal methemoglobin levels are < 2%; levels < 5% do not require treatment. Methemoglobinemia during NO inhalation has been previously reported, especially in newborns, but its incidence appears low and is related to the inhaled NO dose.<sup>37,38</sup> In a clinical study, Wessel *et al.*<sup>39</sup> reported methemoglobin concentrations greater than 5% in 4 of 123 patients who received inhaled NO. Our current report is consistent with previous studies in adults<sup>8,9,11,18,19,40</sup> that concluded that clinically significant methemoglobinemia is very rare after exposure to NO concentrations of < 40 ppm. It is important to realize that hyperlipidemia may interfere with the determination of methemoglobin concentrations by co-oximetry and result in falsely elevated values.<sup>17</sup>

A potentially serious adverse effect related to NO treatment that we observed was the onset of acutely increased pulmonary hypertension and hypoxemia with sudden discontinuation of treatment. This adverse effect of NO inhalation has been reported previously.<sup>9,41,42</sup> The cause of this rebound effect is unknown. Suggested mechanisms include a decrease of NO synthase activity

or an increase of tissue cGMP-phosphodiesterase activity as a result of exogenous NO.<sup>22,42</sup> We have noticed that this phenomenon may occur even after slowly decreasing the inspired NO concentration over several days and discontinuing very low levels of NO (< 1 ppm). Currently, we continue inhaled NO until the requirements for ventilatory support are minimal (*i.e.*, 40% F<sub>I</sub>O<sub>2</sub> and < 10 cm H<sub>2</sub>O positive end-expiratory pressure) and vasopressor or inotropic therapy is no longer required. We also temporarily increase the F<sub>I</sub>O<sub>2</sub> to 60-80% when discontinuing NO. Discontinuation of inhaled NO has been well tolerated under these conditions and reinstitution of inhaled NO, inotropic support, or vasodilator therapy has not been required.

Although prolonged inhalation of low doses of NO appears safe, the potential long-term toxic effects remain unclear.<sup>43</sup> The effects of inhaled NO on surfactant, free radical, and peroxynitrite production are unknown. Therefore we continue to be cautious during NO inhalation by administering low concentrations of inhaled NO, monitoring the inspired NO concentration closely, and using delivery systems that are simple and safe.

#### Limitations and Conclusions

The main limitation of our study is its retrospective nature. Until definitive, controlled studies are published, our large series of patients may provide guidance to the critical care practitioners and clinical investigators with regard to the physiologic determinants of the response to inhaled NO in patients with ARDS.

Inhaled NO caused a clinically important improvement of oxygen exchange, pulmonary hypertension, or both in 58% of patients with ARDS. The absence of septic shock was the best predictor of a favorable response to NO inhalation. Additional characteristics that may be helpful in identifying those patient populations most likely to have the greatest beneficial response to NO inhalation include marked pulmonary hypertension, the absence of renal failure, and a short course of respiratory failure before therapy.

The authors thank Warren M. Zapol for his encouragement and support of our clinical investigations of acute respiratory failure; Deborah Chase, R.R.T., Gary Collymore, R.R.T., Purris Williams, R.R.T., and Donna Nicholas, R.R.T., for their efforts in data recording; and the physicians, respiratory therapists, and nurses of the intensive care units of the Massachusetts General Hospital for their ongoing help.

## References

1. Bernard GR, Luce GR, Sprung CL, Rinaldo JE, Tate RM, Sibbald WJ, Kariman K, Higgins S, Bradley R, Metz GA, TR H, Brigham KL: High dose corticosteroids in patients with the adult respiratory distress syndrome. *N Engl J Med* 1987; 317:1565-70
2. Zapol WM, Snider MT: Pulmonary hypertension in severe acute respiratory failure. *N Engl J Med* 1977; 296:476-80
3. Dreyfuss D, Soler P, Saumon G: Mechanical ventilation-induced pulmonary edema. Interactions with previous lung alterations. *Am J Respir Crit Care Med* 1995; 151:1568-75
4. Moncada S, Higgs A: The L-arginine-nitric oxide pathway. *N Engl J Med* 1993; 329:2002-12
5. Frostell C, Fratacci MD, Wain JC, Jones R, Zapol WM: Inhaled nitric oxide. A selective pulmonary vasodilator reversing hypoxic pulmonary vasoconstriction. *Circulation* 1991; 83:2038-47
6. Fratacci MD, Frostell CG, Chen TY, Wain JC Jr, Robinson DR, Zapol WM: Inhaled nitric oxide. A selective pulmonary vasodilator of heparin-protamine vasoconstriction in sheep. *ANESTHESIOLOGY* 1991; 75:990-9
7. Pison U, Lopez FA, Heideimeyer CF, Roissant R, Falke KJ: Inhaled nitric oxide reverses hypoxic pulmonary vasoconstriction without impairing gas exchange. *J Appl Physiol* 1993; 74:1287-92
8. Rossaint R, Falke KJ, Lopez F, Slama K, Pison U, Zapol WM: Inhaled nitric oxide for the adult respiratory distress syndrome. *N Engl J Med* 1993; 328:399-405
9. Bigatello LM, Hurford WE, Kacmarek RM, Roberts JD Jr, Zapol WM: Prolonged inhalation of low concentrations of nitric oxide in patients with severe adult respiratory distress syndrome. Effects on pulmonary hemodynamics and oxygenation. *ANESTHESIOLOGY* 1994; 80:761-70
10. Puybasset L, Stewart T, Rouby JJ, Cluzel P, Mourgeon E, Belin MF, Arthaud M, Landault C, Viars P: Inhaled nitric oxide reverses the increase in pulmonary vascular resistance induced by permissive hypercapnia in patients with acute respiratory distress syndrome. *ANESTHESIOLOGY* 1994; 80:1254-67
11. Young JD, Brampton WJ, Knighton JD, Finfer SR: Inhaled nitric oxide in acute respiratory failure in adults. *Br J Anaesth* 1994; 73:499-502
12. Dellinger RP, Zimmerman JL, Hyers TM, Taylor RW, Straube RC, Hauser DL, Damask MC, Davis K Jr, Criner GJ: Inhaled nitric oxide in ARDS: Preliminary results of a multicenter clinical trial. *Crit Care Med* 1996; 24:A29
13. Knaus WA, Draper EA, Wagner DP, Zimmerman JE: Prognosis in acute organ system failure. *Ann Surg* 1985; 202:685-93
14. Members of the American College of Chest Physicians/Society of Critical Care Medicine Consensus Conference Committee: Definitions for sepsis and organ failure and guidelines for the use of innovative therapies in sepsis. *Crit Care Med* 1992; 20:864-74
15. Murray JF, Matthay MA, Luce JM, Flick MR: An expanded definition of the adult respiratory distress syndrome. *Am Rev Respir Dis* 1988; 138:720-3
16. Knaus WA, Draper EA, Wagner DP, Zimmerman JE: APACHE II: A severity of disease classification system. *Crit Care Med* 1985; 13: 818-29
17. Spurzem JR, Bonekat HW, Shigeoka JW: Factitious methemoglobinemia caused by hyperlipemia. *Chest* 1984; 86:84-6
18. Rossaint R, Gerlach H, Schmidt-Ruhnke H, Pappert D, Lewandowski K, Steudel W, Falke K: Efficacy of inhaled nitric oxide in patients with severe ARDS. *Chest* 1995; 107:1107-15
19. McIntyre R, Moore F, Moore E, Piedalue F, Haenel J, Fullerton D: Inhaled nitric oxide variably improves oxygenation and pulmonary hypertension in patients with acute respiratory distress syndrome. *J Trauma* 1995; 39:418-25
20. Wysocki M, Delclaux C, Roupie E, Langeron O, Liu N, Herman B, Lemaire F, Brochard L: Additive effect on gas exchange of inhaled nitric oxide and intravenous almitrine bismesylate in the adult respiratory distress syndrome. *Intensive Care Med* 1994; 20:254-9
21. Krafft P, Fridrich P, Fitzgerald RD, Koc D, Steltzer H: Effectiveness of nitric oxide inhalation in septic ARDS. *Chest* 1996; 109:486-93
22. Zapol WM, Rimar S, Gillis N, Marletta M, Bosken CH: Nitric oxide and the lung. NHLBI workshop summary. *Am J Respir Crit Care Med* 1994; 149:1375-80
23. Szabo C, Mitchell JA, Theimermann C, Vane JR: Nitric oxide-mediated hyporeactivity to noradrenaline precedes the induction of nitric oxide synthase in endotoxin shock. *Br J Pharmacol* 1993; 108:786-92
24. Holzmann A, Bloch KD, Sanchez LS, Filippov G, Zapol WM: Hyporesponsiveness to inhaled NO in isolated, perfused lungs from endotoxin-challenged rats. *Am J Physiol* 1996; 271(6Pt1):L981-6
25. Puybasset L, Rouby JJ, Mourgeon E, Cluzel P, Souhil Z, Law-Koune J-D, Stewart T, Devilliers C, Lu Q, Roche S, Kalfon P, Vicaut E, Viars P: Factors influencing cardiopulmonary effects of inhaled nitric oxide in acute respiratory failure. *Am J Respir Crit Care Med* 1995; 152:318-28
26. Rich GF, Murphy GD Jr, Roos CM, Johns RA: Inhaled nitric oxide: selective pulmonary vasodilation in cardiac surgical patients. *ANESTHESIOLOGY* 1993; 78:1028-35
27. Toothill C: The chemistry of the in-vivo reaction between hemoglobin and various oxides of nitrogen. *Br J Anaesth* 1967; 39:405-12
28. Greenbaum R, Bay J, Hargreaves MD, Kain ML, Kelman GR, Nunn JF, Prys-Roberts C, Siebold K: Effects of higher oxides of nitrogen on the anesthetized dog. *Br J Anaesth* 1967; 39:393-404
29. Evans MJ, Stephens RJ, Cabral LJ, Freeman G: Cell renewal in the lungs of rats exposed to low levels of NO<sub>2</sub>. *Arch Environ Health* 1972; 24:180-8
30. Stephens RJ, Freeman G, Evans MJ: Early response of lungs to low levels of nitrogen dioxide. *Arch Environ Health* 1972; 24:160-79
31. Bylin G, Hedenstierna G, Lindvall T, Sundin B: Ambient nitrogen dioxide concentrations increase bronchial responsiveness in subjects with mild asthma. *Eur Respir J* 1988; 1:606-12
32. Frampton MW, Morrow PE, Cox C, Gibb R, Speers DM, Utell MJ: Effects of nitrogen dioxide exposure on pulmonary function and airway reactivity in normal humans. *Am Rev Respir Dis* 1991; 143:522-7
33. Morrow PE, Utell MJ, Bauer MA, Smeglin AM, Frampton MW, Cox C, Speers DM, Gibb FR: Pulmonary performance of elderly normal subjects with chronic obstructive pulmonary disease exposed to 0.3 ppm nitrogen dioxide. *Am Rev Respir Dis* 1992; 145:291-300
34. Nishimura M, Hess D, Kacmarek RM, Ritz R, Hurford WE: Nitrogen dioxide production during mechanical ventilation with nitric oxide in adults. Effects of ventilator internal volume, air versus

---

 INHALED NO IN ARDS
 

---

nitrogen dilution, minute ventilation, and inspired oxygen fraction. *ANESTHESIOLOGY* 1995; 82:1246-54

35. Curry S: Methemoglobinemia. *Ann Emerg Med* 1982; 11:214-21

36. Bunn HF: Disorders of hemoglobin. In: Wilson JD, Braunwald E, Isselbacher KJ, et al., eds. *Principles of Internal Medicine*, Volume 2. New York, McGraw-Hill, 1991:1543-52

37. Iwamoto J, Krasney JA, Morin FC III. Methemoglobin production by nitric oxide in fresh sheep blood. *Respir Physiol* 1994; 96:273-83

38. Young JD, Dyar O, Xiong L, Howell S: Methaemoglobin production in normal adults inhaling low concentrations of nitric oxide. *Intensive Care Medicine* 1994; 20:581-4

39. Wessel DL, Adatia I, Thompson JE, Hickey PR: Delivery and

monitoring of inhaled nitric oxide in patients with pulmonary hypertension. *Crit Care Med* 1994; 22:930-8

40. Abman SH, Griebel JL, Parker DK, Schmidt JM, Swanton D, Kinsella JP: Acute effects of inhaled nitric oxide in children with severe hypoxemic respiratory failure. *J Pediatr* 1994; 124:881-8

41. Gerlach H, Pappert D, Lewandowski K, Rossaint R, Falke KJ: Long-term inhalation with evaluated low doses of nitric oxide for selective improvement of oxygenation in patients with adult respiratory distress syndrome. *Intensive Care Medicine* 1993; 19:443-9

42. Lavoie A, Hall JB, Olson DM, Wylam ME: Life-threatening effects of discontinuing inhaled nitric oxide in severe respiratory failure. *Am J Respir Crit Care Med* 1996; 153:1985-7

43. Gaston B, Drazen JM, Loscalzo J, Stamler JS: The biology of nitrogen oxides in the airway. *Am J Respir Crit Care Med* 1994; 149:538-51
